# Supplementary material for: Multicolor Combinatorial Probe Coding for Real-Time PCR
Source: PLoS One. 2011 Jan 14;6(1):e16033. doi: 10.1371/journal.pone.0016033 (PMC3021529; doi:10.1371/journal.pone.0016033)
Supplement: Table S4 — Sequences of primers and probes used for identification of 10 foodborne pathogens. (DOC) [file pone.0016033.s004.doc]

**Table S4**. **Sequences of primers and probes used for identification of 10 foodborne pathogens**

| **Bacterium strains** | **Target gene** | **Sequence, *a* 5' →3'** |
| --- | --- | --- |
| *Salmonella Typhi*  *E. coli O157:H7*  *Shigella*  *B.cereus*  *V. parahaemolyticus*  *L. monocytogenes*  *S.aureus*  *V. cholerae*  *S. pyogenes*  *Y. enterocolitica* | ssaR  rfbE  ipaH  ces  tdh  hly  nuc  ctxA  spy1258  ail  Tag | gaacctggcctgaagacataaa a  agtaatccaatccgaaatgcct b  ROX-ccggctaactgactcaccgtaaatgccgg-Dabycl c  Tag-aggtgaaggtggaatggttgtc a  Tag-gcttgttctaactgggctaatc b  HEX-cggccaaggattagctgtacataggccg-Dabycl c  Tag-tgaaggaaatgcgtttctatg a  Tag-agggagaaccagtccgtaaab  Cy5-cacggccgaagctatggtcagaagccgtg-Dabycl c  Tag-aaactggatgccgttagaaca a  Tag-aagccatcttgtcggttctg b  FAM-cggcgttctcacttgtacttgatttcgccg-Dabycl c  Tag-aaacatctgcttttgagcttcca a  Tag-ctcgaacaacaaacaatatctcatcag b  FAM, HEX-ccggggtgtcccttttcctgcccccgg-Dabycl c  Tag-tgcaagtcctaagacgcca a  Tag-cactgcatctccgtggtatactaa b  ROX, Cy5-cgcgcttgtatatacttatcgatttcatccgcgcg-Dabycl c  Tag-ggcaatacgcaaagaggtt a  Tag-ccacttctatttacgccgttatc b  FAM, Cy5-cgatgcagtctaagtagctcagcaaatgcatcg-Dabycl c  Tag-tccggagcatagagcttgga a  Tag-tcgatgatcttggagcattcc b  HEX, ROX-ccgtggattcatcatgcaccgccacgg-Dabycl c  Tag-ccgcactcgctactatttctta a  Tag-attggtcacaatgtcttggaaac b  FAM, ROX-ccgcagaaatccttgatgagttgcgg-Dabycl c  Tag-ggttatgcgcaaagccatgt a  Tag-ccctgatgagtataagcaaacgab  HEX, Cy5-ctccccgttatgaactcgatgataactggggag-Dabycl c  gcaagccctcacgtagcgaa |

a forward primer, b reverse primer, c probe
